# Supplementary material for: A comprehensive update to the Mycobacterium tuberculosis H37Rv reference genome
Source: Springer Nature journal article supplement (doi:10.1038/s41467-022-34853-x), 2022-11-18
Supplement: MOESM3 [file 41467_2022_34853_MOESM3_ESM.pdf]

## **Description of Additional Supplementary Files:**

**Supplementary Data 1:** SNP and indel differences found between the H37Rv1998 reference and H37Rv (new)

**Supplementary Data 2:** H37Rv(new) Fasta sequence

**Supplementary Data 3:** H37Rv(new) annotated file

**Supplementary Data 4:** Primer sequences for PCR validation of the R3 region
