# Supplementary material for: A comprehensive update to the Mycobacterium tuberculosis H37Rv reference genome
Source: Nat Commun. 2022 Nov 18;13:7068. doi: 10.1038/s41467-022-34853-x (PMC9673877; doi:10.1038/s41467-022-34853-x)
Supplement: Supplementary file 4 — Supplementary Dataset 1 [file 41467_2022_34853_MOESM4_ESM.xlsx]

## Sheet: Supplementary Data 1
Supplementary Data 1. Position of SNP and indel differences observed between H37Rv (new) and the H37Rv 1998 reference sequence
Position in H37Rv (new)	basepair in H37Rv (new)	basepair in H37Rv1998	Position in H37Rv1998	H37Rv (new) genome size (bp)	H37Rv1998 reference size (bp)	H37Rv (new) contig #	H37Rv1998 contig #	H37Rv (new) contig name	H37Rv1998 contig name
14785	C	T	14785	4417942	4411532	1	1	cluster_001_consensus_pilon_pilon_pilon	NC_000962.3
55548	.	G	55549	4417942	4411532	1	1	cluster_001_consensus_pilon_pilon_pilon	NC_000962.3
55548	.	C	55550	4417942	4411532	1	1	cluster_001_consensus_pilon_pilon_pilon	NC_000962.3
55548	.	C	55551	4417942	4411532	1	1	cluster_001_consensus_pilon_pilon_pilon	NC_000962.3
55550	T	C	55553	4417942	4411532	1	1	cluster_001_consensus_pilon_pilon_pilon	NC_000962.3
69986	A	G	69989	4417942	4411532	1	1	cluster_001_consensus_pilon_pilon_pilon	NC_000962.3
115997	G	T	116000	4417942	4411532	1	1	cluster_001_consensus_pilon_pilon_pilon	NC_000962.3
131173	G	.	131175	4417942	4411532	1	1	cluster_001_consensus_pilon_pilon_pilon	NC_000962.3
132415	G	C	132417	4417942	4411532	1	1	cluster_001_consensus_pilon_pilon_pilon	NC_000962.3
234475	G	T	234477	4417942	4411532	1	1	cluster_001_consensus_pilon_pilon_pilon	NC_000962.3
234495	G	.	234496	4417942	4411532	1	1	cluster_001_consensus_pilon_pilon_pilon	NC_000962.3
234496	T	.	234496	4417942	4411532	1	1	cluster_001_consensus_pilon_pilon_pilon	NC_000962.3
333892	C	G	333892	4417942	4411532	1	1	cluster_001_consensus_pilon_pilon_pilon	NC_000962.3
336681	C	G	336681	4417942	4411532	1	1	cluster_001_consensus_pilon_pilon_pilon	NC_000962.3
336682	C	G	336682	4417942	4411532	1	1	cluster_001_consensus_pilon_pilon_pilon	NC_000962.3
336683	.	A	336684	4417942	4411532	1	1	cluster_001_consensus_pilon_pilon_pilon	NC_000962.3
336688	C	G	336689	4417942	4411532	1	1	cluster_001_consensus_pilon_pilon_pilon	NC_000962.3
336689	A	C	336690	4417942	4411532	1	1	cluster_001_consensus_pilon_pilon_pilon	NC_000962.3
336690	C	T	336691	4417942	4411532	1	1	cluster_001_consensus_pilon_pilon_pilon	NC_000962.3
336693	C	.	336693	4417942	4411532	1	1	cluster_001_consensus_pilon_pilon_pilon	NC_000962.3
336694	C	A	336694	4417942	4411532	1	1	cluster_001_consensus_pilon_pilon_pilon	NC_000962.3
336698	G	C	336698	4417942	4411532	1	1	cluster_001_consensus_pilon_pilon_pilon	NC_000962.3
336701	G	A	336701	4417942	4411532	1	1	cluster_001_consensus_pilon_pilon_pilon	NC_000962.3
336707	A	G	336707	4417942	4411532	1	1	cluster_001_consensus_pilon_pilon_pilon	NC_000962.3
336708	C	T	336708	4417942	4411532	1	1	cluster_001_consensus_pilon_pilon_pilon	NC_000962.3
336710	G	A	336710	4417942	4411532	1	1	cluster_001_consensus_pilon_pilon_pilon	NC_000962.3
337959	C	A	337959	4417942	4411532	1	1	cluster_001_consensus_pilon_pilon_pilon	NC_000962.3
338020	C	A	338020	4417942	4411532	1	1	cluster_001_consensus_pilon_pilon_pilon	NC_000962.3
338100	C	T	338100	4417942	4411532	1	1	cluster_001_consensus_pilon_pilon_pilon	NC_000962.3
338453	G	A	338453	4417942	4411532	1	1	cluster_001_consensus_pilon_pilon_pilon	NC_000962.3
390828	C	T	390828	4417942	4411532	1	1	cluster_001_consensus_pilon_pilon_pilon	NC_000962.3
424322	C	.	424321	4417942	4411532	1	1	cluster_001_consensus_pilon_pilon_pilon	NC_000962.3
459400	C	A	459399	4417942	4411532	1	1	cluster_001_consensus_pilon_pilon_pilon	NC_000962.3
467501	G	.	467499	4417942	4411532	1	1	cluster_001_consensus_pilon_pilon_pilon	NC_000962.3
467511	G	.	467508	4417942	4411532	1	1	cluster_001_consensus_pilon_pilon_pilon	NC_000962.3
467519	C	G	467516	4417942	4411532	1	1	cluster_001_consensus_pilon_pilon_pilon	NC_000962.3
467529	G	C	467526	4417942	4411532	1	1	cluster_001_consensus_pilon_pilon_pilon	NC_000962.3
467549	C	G	467546	4417942	4411532	1	1	cluster_001_consensus_pilon_pilon_pilon	NC_000962.3
467560	C	A	467557	4417942	4411532	1	1	cluster_001_consensus_pilon_pilon_pilon	NC_000962.3
467567	C	A	467564	4417942	4411532	1	1	cluster_001_consensus_pilon_pilon_pilon	NC_000962.3
467588	C	G	467585	4417942	4411532	1	1	cluster_001_consensus_pilon_pilon_pilon	NC_000962.3
467593	C	T	467590	4417942	4411532	1	1	cluster_001_consensus_pilon_pilon_pilon	NC_000962.3
467624	G	T	467621	4417942	4411532	1	1	cluster_001_consensus_pilon_pilon_pilon	NC_000962.3
467641	T	G	467638	4417942	4411532	1	1	cluster_001_consensus_pilon_pilon_pilon	NC_000962.3
608334	G	T	608331	4417942	4411532	1	1	cluster_001_consensus_pilon_pilon_pilon	NC_000962.3
623475	G	A	623472	4417942	4411532	1	1	cluster_001_consensus_pilon_pilon_pilon	NC_000962.3
623511	G	C	623508	4417942	4411532	1	1	cluster_001_consensus_pilon_pilon_pilon	NC_000962.3
635636	T	C	635633	4417942	4411532	1	1	cluster_001_consensus_pilon_pilon_pilon	NC_000962.3
672494	G	C	672491	4417942	4411532	1	1	cluster_001_consensus_pilon_pilon_pilon	NC_000962.3
836275	G	A	836272	4417942	4411532	1	1	cluster_001_consensus_pilon_pilon_pilon	NC_000962.3
836294	G	A	836291	4417942	4411532	1	1	cluster_001_consensus_pilon_pilon_pilon	NC_000962.3
836429	C	A	836426	4417942	4411532	1	1	cluster_001_consensus_pilon_pilon_pilon	NC_000962.3
836457	G	A	836454	4417942	4411532	1	1	cluster_001_consensus_pilon_pilon_pilon	NC_000962.3
836541	G	A	836538	4417942	4411532	1	1	cluster_001_consensus_pilon_pilon_pilon	NC_000962.3
836661	G	A	836658	4417942	4411532	1	1	cluster_001_consensus_pilon_pilon_pilon	NC_000962.3
837036	G	A	837033	4417942	4411532	1	1	cluster_001_consensus_pilon_pilon_pilon	NC_000962.3
838993	G	C	838990	4417942	4411532	1	1	cluster_001_consensus_pilon_pilon_pilon	NC_000962.3
839126	G	A	839123	4417942	4411532	1	1	cluster_001_consensus_pilon_pilon_pilon	NC_000962.3
839132	G	C	839129	4417942	4411532	1	1	cluster_001_consensus_pilon_pilon_pilon	NC_000962.3
839197	G	A	839194	4417942	4411532	1	1	cluster_001_consensus_pilon_pilon_pilon	NC_000962.3
839337	G	A	839334	4417942	4411532	1	1	cluster_001_consensus_pilon_pilon_pilon	NC_000962.3
839351	G	A	839348	4417942	4411532	1	1	cluster_001_consensus_pilon_pilon_pilon	NC_000962.3
840499	G	C	840496	4417942	4411532	1	1	cluster_001_consensus_pilon_pilon_pilon	NC_000962.3
927113	G	A	927110	4417942	4411532	1	1	cluster_001_consensus_pilon_pilon_pilon	NC_000962.3
958925	A	C	958922	4417942	4411532	1	1	cluster_001_consensus_pilon_pilon_pilon	NC_000962.3
990004	C	G	990001	4417942	4411532	1	1	cluster_001_consensus_pilon_pilon_pilon	NC_000962.3
1010209	G	.	1010205	4417942	4411532	1	1	cluster_001_consensus_pilon_pilon_pilon	NC_000962.3
1025110	C	T	1025106	4417942	4411532	1	1	cluster_001_consensus_pilon_pilon_pilon	NC_000962.3
1037915	T	C	1037911	4417942	4411532	1	1	cluster_001_consensus_pilon_pilon_pilon	NC_000962.3
1093410	G	A	1093406	4417942	4411532	1	1	cluster_001_consensus_pilon_pilon_pilon	NC_000962.3
1168721	T	.	1168716	4417942	4411532	1	1	cluster_001_consensus_pilon_pilon_pilon	NC_000962.3
1313343	G	.	1313337	4417942	4411532	1	1	cluster_001_consensus_pilon_pilon_pilon	NC_000962.3
1313344	C	A	1313338	4417942	4411532	1	1	cluster_001_consensus_pilon_pilon_pilon	NC_000962.3
1315197	C	A	1315191	4417942	4411532	1	1	cluster_001_consensus_pilon_pilon_pilon	NC_000962.3
1315890	A	G	1315884	4417942	4411532	1	1	cluster_001_consensus_pilon_pilon_pilon	NC_000962.3
1414027	T	C	1414021	4417942	4411532	1	1	cluster_001_consensus_pilon_pilon_pilon	NC_000962.3
1471665	T	C	1471659	4417942	4411532	1	1	cluster_001_consensus_pilon_pilon_pilon	NC_000962.3
1711840	T	C	1711627	4417942	4411532	1	1	cluster_001_consensus_pilon_pilon_pilon	NC_000962.3
1780800	G	.	1780586	4417942	4411532	1	1	cluster_001_consensus_pilon_pilon_pilon	NC_000962.3
1893484	G	A	1893270	4417942	4411532	1	1	cluster_001_consensus_pilon_pilon_pilon	NC_000962.3
2007604	G	A	2006032	4417942	4411532	1	1	cluster_001_consensus_pilon_pilon_pilon	NC_000962.3
2053318	C	T	2051746	4417942	4411532	1	1	cluster_001_consensus_pilon_pilon_pilon	NC_000962.3
2059346	T	A	2057774	4417942	4411532	1	1	cluster_001_consensus_pilon_pilon_pilon	NC_000962.3
2154982	G	A	2153410	4417942	4411532	1	1	cluster_001_consensus_pilon_pilon_pilon	NC_000962.3
2209164	C	.	2207591	4417942	4411532	1	1	cluster_001_consensus_pilon_pilon_pilon	NC_000962.3
2253572	G	A	2251999	4417942	4411532	1	1	cluster_001_consensus_pilon_pilon_pilon	NC_000962.3
2284360	T	C	2282787	4417942	4411532	1	1	cluster_001_consensus_pilon_pilon_pilon	NC_000962.3
2389306	C	T	2387733	4417942	4411532	1	1	cluster_001_consensus_pilon_pilon_pilon	NC_000962.3
2524780	G	.	2523206	4417942	4411532	1	1	cluster_001_consensus_pilon_pilon_pilon	NC_000962.3
2524781	C	.	2523206	4417942	4411532	1	1	cluster_001_consensus_pilon_pilon_pilon	NC_000962.3
2524782	C	.	2523206	4417942	4411532	1	1	cluster_001_consensus_pilon_pilon_pilon	NC_000962.3
2527301	.	G	2525726	4417942	4411532	1	1	cluster_001_consensus_pilon_pilon_pilon	NC_000962.3
2722491	G	T	2718852	4417942	4411532	1	1	cluster_001_consensus_pilon_pilon_pilon	NC_000962.3
2755443	T	C	2751804	4417942	4411532	1	1	cluster_001_consensus_pilon_pilon_pilon	NC_000962.3
2813260	C	T	2809621	4417942	4411532	1	1	cluster_001_consensus_pilon_pilon_pilon	NC_000962.3
2958078	C	T	2954439	4417942	4411532	1	1	cluster_001_consensus_pilon_pilon_pilon	NC_000962.3
3058363	G	A	3054724	4417942	4411532	1	1	cluster_001_consensus_pilon_pilon_pilon	NC_000962.3
3383523	C	G	3379708	4417942	4411532	1	1	cluster_001_consensus_pilon_pilon_pilon	NC_000962.3
3383527	C	G	3379712	4417942	4411532	1	1	cluster_001_consensus_pilon_pilon_pilon	NC_000962.3
3383533	C	T	3379718	4417942	4411532	1	1	cluster_001_consensus_pilon_pilon_pilon	NC_000962.3
3383541	A	C	3379726	4417942	4411532	1	1	cluster_001_consensus_pilon_pilon_pilon	NC_000962.3
3383545	C	G	3379730	4417942	4411532	1	1	cluster_001_consensus_pilon_pilon_pilon	NC_000962.3
3383547	T	C	3379732	4417942	4411532	1	1	cluster_001_consensus_pilon_pilon_pilon	NC_000962.3
3383550	C	A	3379735	4417942	4411532	1	1	cluster_001_consensus_pilon_pilon_pilon	NC_000962.3
3383551	A	C	3379736	4417942	4411532	1	1	cluster_001_consensus_pilon_pilon_pilon	NC_000962.3
3383557	C	T	3379742	4417942	4411532	1	1	cluster_001_consensus_pilon_pilon_pilon	NC_000962.3
3383566	C	A	3379751	4417942	4411532	1	1	cluster_001_consensus_pilon_pilon_pilon	NC_000962.3
3383572	C	A	3379757	4417942	4411532	1	1	cluster_001_consensus_pilon_pilon_pilon	NC_000962.3
3383578	A	G	3379763	4417942	4411532	1	1	cluster_001_consensus_pilon_pilon_pilon	NC_000962.3
3383599	A	C	3379784	4417942	4411532	1	1	cluster_001_consensus_pilon_pilon_pilon	NC_000962.3
3383603	G	C	3379788	4417942	4411532	1	1	cluster_001_consensus_pilon_pilon_pilon	NC_000962.3
3384255	C	.	3380439	4417942	4411532	1	1	cluster_001_consensus_pilon_pilon_pilon	NC_000962.3
3584439	.	T	3580638	4417942	4411532	1	1	cluster_001_consensus_pilon_pilon_pilon	NC_000962.3
3594488	C	.	3590686	4417942	4411532	1	1	cluster_001_consensus_pilon_pilon_pilon	NC_000962.3
3722333	T	C	3718357	4417942	4411532	1	1	cluster_001_consensus_pilon_pilon_pilon	NC_000962.3
3868185	.	A	3862473	4417942	4411532	1	1	cluster_001_consensus_pilon_pilon_pilon	NC_000962.3
3902052	G	T	3896340	4417942	4411532	1	1	cluster_001_consensus_pilon_pilon_pilon	NC_000962.3
3947093	G	A	3940802	4417942	4411532	1	1	cluster_001_consensus_pilon_pilon_pilon	NC_000962.3
3954044	G	A	3947753	4417942	4411532	1	1	cluster_001_consensus_pilon_pilon_pilon	NC_000962.3
3954045	G	A	3947754	4417942	4411532	1	1	cluster_001_consensus_pilon_pilon_pilon	NC_000962.3
3954062	G	A	3947771	4417942	4411532	1	1	cluster_001_consensus_pilon_pilon_pilon	NC_000962.3
3954080	G	A	3947789	4417942	4411532	1	1	cluster_001_consensus_pilon_pilon_pilon	NC_000962.3
3954089	G	A	3947798	4417942	4411532	1	1	cluster_001_consensus_pilon_pilon_pilon	NC_000962.3
3954105	A	G	3947814	4417942	4411532	1	1	cluster_001_consensus_pilon_pilon_pilon	NC_000962.3
3954107	G	A	3947816	4417942	4411532	1	1	cluster_001_consensus_pilon_pilon_pilon	NC_000962.3
3954113	G	A	3947822	4417942	4411532	1	1	cluster_001_consensus_pilon_pilon_pilon	NC_000962.3
3954119	G	A	3947828	4417942	4411532	1	1	cluster_001_consensus_pilon_pilon_pilon	NC_000962.3
3954456	G	A	3948054	4417942	4411532	1	1	cluster_001_consensus_pilon_pilon_pilon	NC_000962.3
3954748	G	.	3948345	4417942	4411532	1	1	cluster_001_consensus_pilon_pilon_pilon	NC_000962.3
3954749	G	.	3948345	4417942	4411532	1	1	cluster_001_consensus_pilon_pilon_pilon	NC_000962.3
3954750	C	.	3948345	4417942	4411532	1	1	cluster_001_consensus_pilon_pilon_pilon	NC_000962.3
3954751	C	.	3948345	4417942	4411532	1	1	cluster_001_consensus_pilon_pilon_pilon	NC_000962.3
3954752	G	.	3948345	4417942	4411532	1	1	cluster_001_consensus_pilon_pilon_pilon	NC_000962.3
3954753	G	.	3948345	4417942	4411532	1	1	cluster_001_consensus_pilon_pilon_pilon	NC_000962.3
3954754	C	.	3948345	4417942	4411532	1	1	cluster_001_consensus_pilon_pilon_pilon	NC_000962.3
3954755	G	.	3948345	4417942	4411532	1	1	cluster_001_consensus_pilon_pilon_pilon	NC_000962.3
3954756	G	.	3948345	4417942	4411532	1	1	cluster_001_consensus_pilon_pilon_pilon	NC_000962.3
3954758	G	T	3948347	4417942	4411532	1	1	cluster_001_consensus_pilon_pilon_pilon	NC_000962.3
3954773	G	T	3948362	4417942	4411532	1	1	cluster_001_consensus_pilon_pilon_pilon	NC_000962.3
3954815	G	T	3948404	4417942	4411532	1	1	cluster_001_consensus_pilon_pilon_pilon	NC_000962.3
3954825	G	T	3948414	4417942	4411532	1	1	cluster_001_consensus_pilon_pilon_pilon	NC_000962.3
3954828	G	T	3948417	4417942	4411532	1	1	cluster_001_consensus_pilon_pilon_pilon	NC_000962.3
4101412	.	G	4095002	4417942	4411532	1	1	cluster_001_consensus_pilon_pilon_pilon	NC_000962.3
4407071	.	C	4400662	4417942	4411532	1	1	cluster_001_consensus_pilon_pilon_pilon	NC_000962.3
