# Supplementary material for: A comprehensive update to the Mycobacterium tuberculosis H37Rv reference genome
Source: Nat Commun. 2022 Nov 18;13:7068. doi: 10.1038/s41467-022-34853-x (PMC9673877; doi:10.1038/s41467-022-34853-x)
Supplement: Supplementary file 7 — Supplementary Dataset 4 [file 41467_2022_34853_MOESM7_ESM.xlsx]

## Sheet: Supplementary data 4
Supplementary data 4
Primer type	Primer sequence	Direction
inner	AGAAAGTGCTGACTCC	Forward
	GTGACCTGTTGATTATGG	Reverse
outer	GCACCGGCATAGATCC	Forward
	AATCCGCATGTGGTG	Reverse
